# Supplementary material
Source: Springer Nature journal article supplement (https://www.springermedizin.de/resource/supplementary/12967_2011_692_MOESM3_ESM.pdf/9577292)

# Re-evaluation of SERPINE1 mRNA expression in fibroblasts - Hypoxia

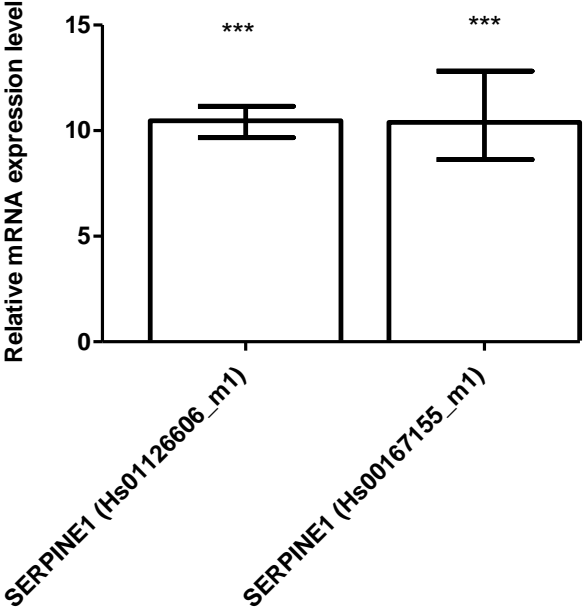

Supplement: MOESM3 [file 9577292]
